# Supplementary material for: Improved photon-to-electron response of ternary blend organic solar cells with a low band gap polymer sensitizer and interfacial modification
Source: Royal Society of Chemistry journal article supplement (doi:10.1039/c5ta09727d), 2016-01-01
Supplement: c5ta09727d1.pdf [file c5ta09727d1.pdf]

## Supporting Information

### Improved photon-to-electron response of ternary blend organic solar cells with low band gap polymer sensitizer and interfacial modification

Shuhua Zhang,<sup>a</sup> Lijian Zuo,<sup>a,\*</sup> Jiehuan Chen,<sup>a</sup> Zhongqiang Zhang,<sup>a</sup> Jiangquan Mai,<sup>b</sup> Tsz-Ki Lau,<sup>b</sup> Xinhui Lu,<sup>b</sup> Minmin Shi<sup>a</sup> and Hongzheng Chen<sup>a,\*</sup>

<sup>a</sup> State Key Laboratory of Silicon Materials, MOE Key Laboratory of Macromolecular Synthesis and Functionalization, Department of Polymer Science & Engineering, Zhejiang University, Hangzhou 310027, P. R. China

E-mail: [hzchen@zju.edu.cn](mailto:hzchen@zju.edu.cn), [zjuzlj@gmail.com](mailto:zjuzlj@gmail.com)

<sup>b</sup> Department of Physics, Chinese University of Hong Kong, New Territories, Hong Kong, P. R. China

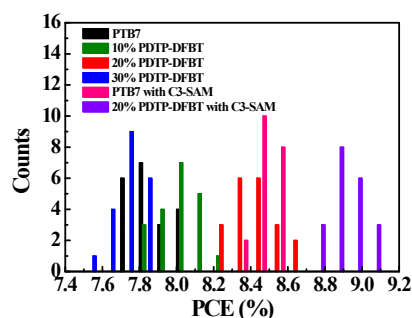

Fig. S1 PCE histograms of the binary and ternary inverted PSCs with and without C3-SAM.

The PCE distribution of the binary and ternary PSCs was match up with the trend of the performance summarized in Table 1. Compared with that of the PSCs without C3-SAM modification, the device performance of the binary and ternary PSCs with C3-SAM modification showed a narrow distribution of PCE. This indicated that the C3-SAM could also improve the reproducibility of organic solar cells<sup>31</sup>.

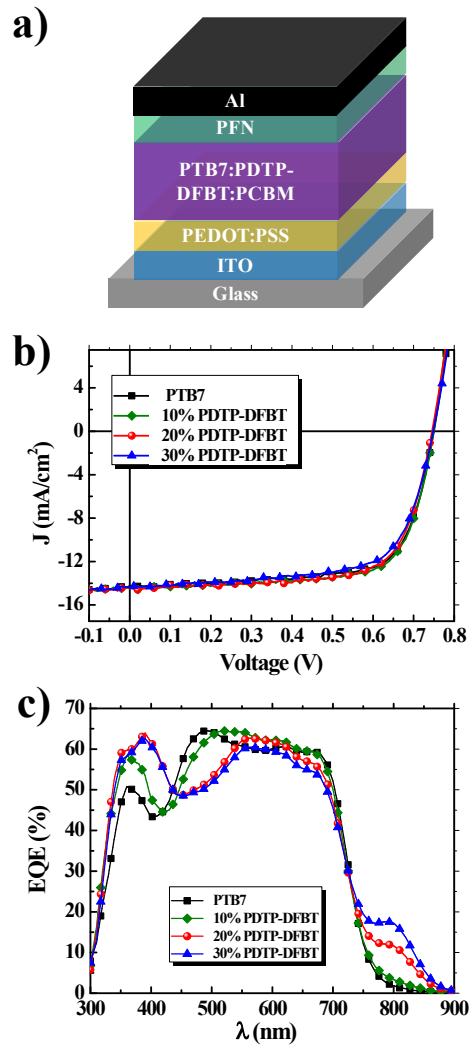

Fig. S2 a) Schematic device structure of the conventional single junction ternary solar cells; b) J-V characteristics and c) EQE spectra of PTB7:PDTP-DFBT:PC<sub>71</sub>BM with different weight fractions of PDTP-DFBT under AM 1.5G illumination at 100 mW cm<sup>-2</sup>.

Table S1 Summarized solar cell parameters of the ternary PTB7:PDTP-DFBT:PC<sub>71</sub>BM blends with different weight ratios of PTB7:PDTP-DFBT conventional devices

| PTB7:PDTP-DFBT:PC <sub>71</sub> BM | J <sub>sc</sub><br>(mA cm <sup>2</sup> ) | V <sub>oc</sub> (V) | FF (%) | PCE (%) |           |
|------------------------------------|------------------------------------------|---------------------|--------|---------|-----------|
|                                    |                                          |                     |        | Best    | Average   |
| 1:0:1.5                            | 14.25                                    | 0.75                | 71.18  | 7.61    | 7.42±0.12 |
| 0.9:0.1:1.5                        | 14.49                                    | 0.75                | 70.96  | 7.72    | 7.55±0.14 |
| 0.8:0.2:1.5                        | 14.44                                    | 0.75                | 69.55  | 7.53    | 7.28±0.14 |
| 0.7:0.3:1.5                        | 14.35                                    | 0.75                | 67.47  | 7.26    | 7.01±0.10 |

#### Conventional device fabrication

The cleaned ITO glass substrates were spin-coated with PEDOT:PSS AL-P 4083 at 3000 rpm for 40 s, followed by heating at 140°C in air for 15min. The PEDOT:PSS coated substrates were then transferred into a N<sub>2</sub> glovebox for further processing. In the following, 25 mg/ml PTB7:PDTP-DFBT:PC<sub>71</sub>BM (10 mg/ml for polymer and 15 mg/ml for PC<sub>71</sub>BM) solution in chlorobenzene solvent with 3% solvent additives (DIO) was

spin-cast on the PEDOT:PSS at 1400 rpm to form 110 nm thickness active layer. 0.4mg/ml PFN methanol solution was spin-cast on the active layer at 3000 rpm for 40s to form a cathode modification layer. Finally, a 10 nm Al was evaporated on the PFN in vacuum to complete the conventional devices.
